# Supplementary material
Source: PubMed Central journal article supplement (PMC2989005)

Figure S1

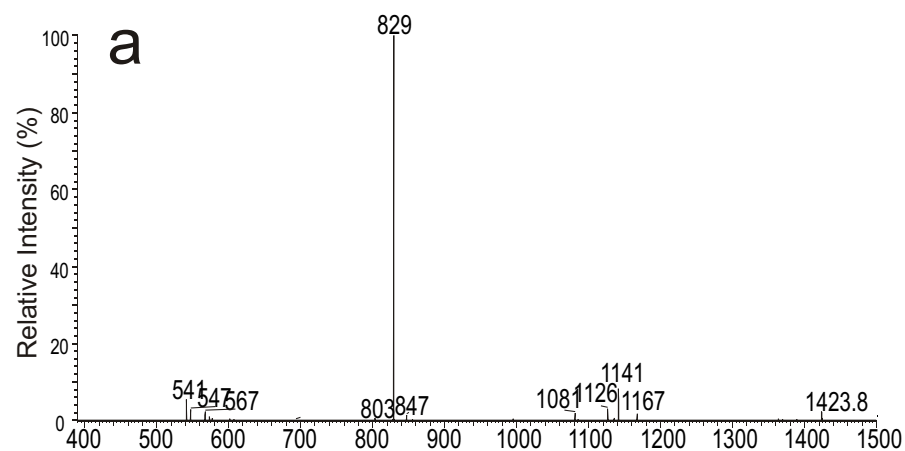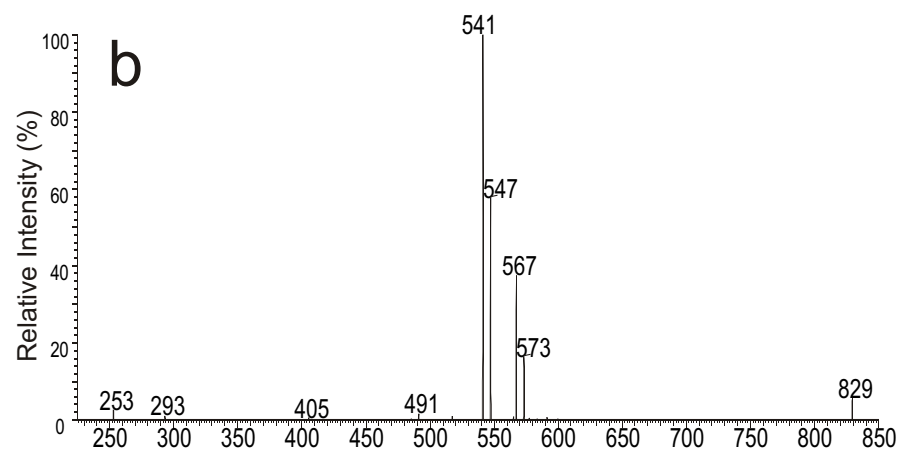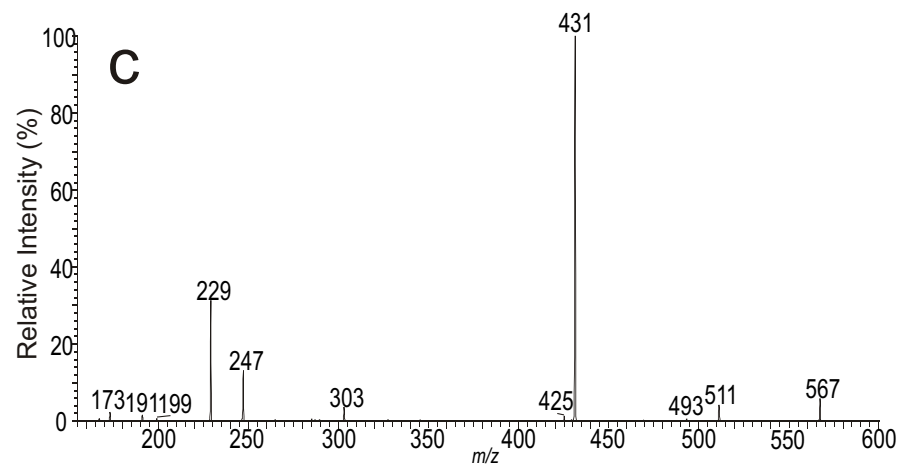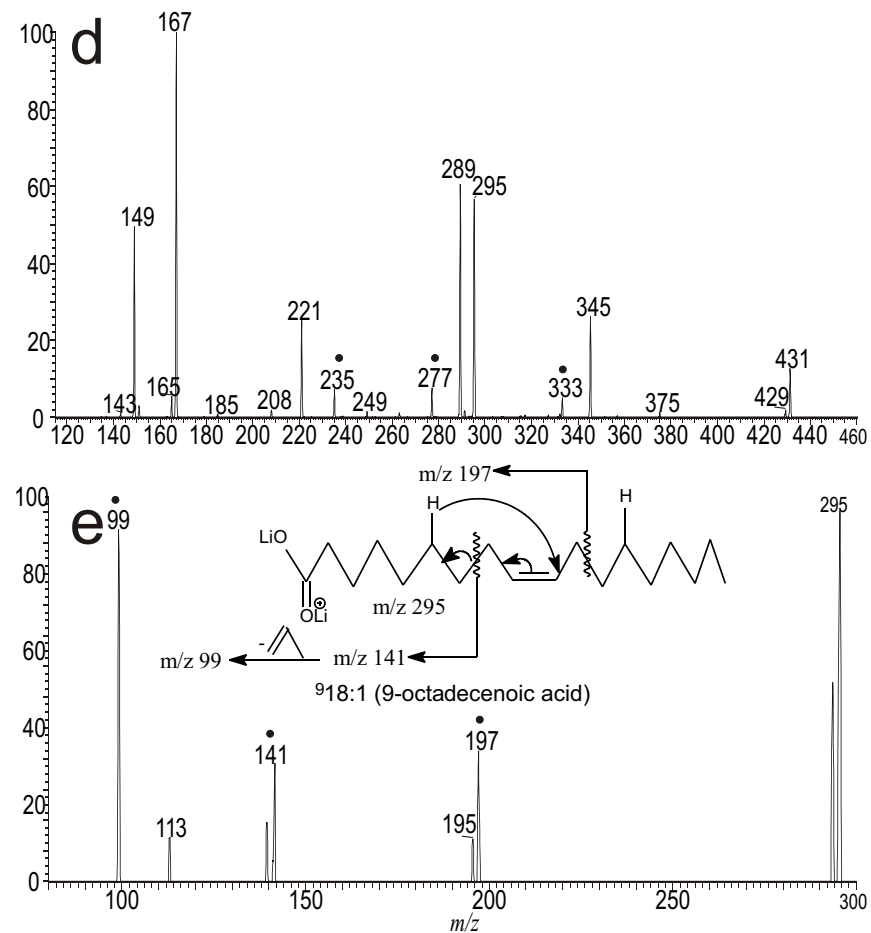

Supplement: NIHMS235257-supplement-01.pdf [file NIHMS235257-supplement-01.pdf]

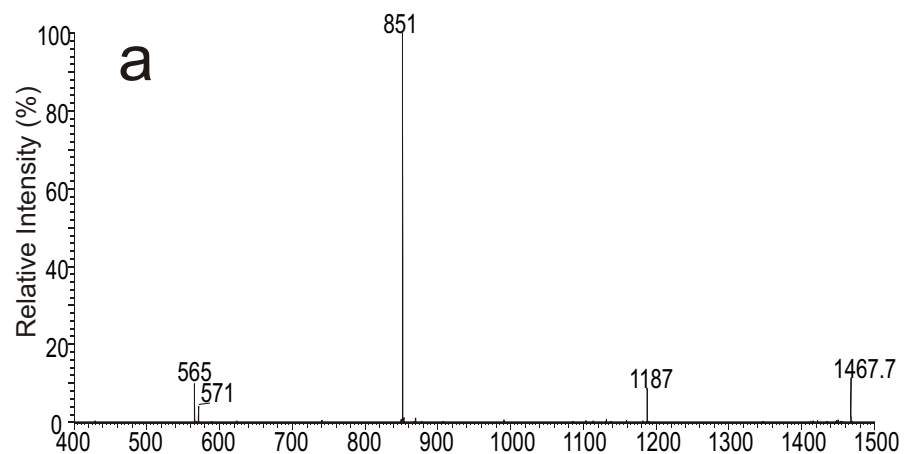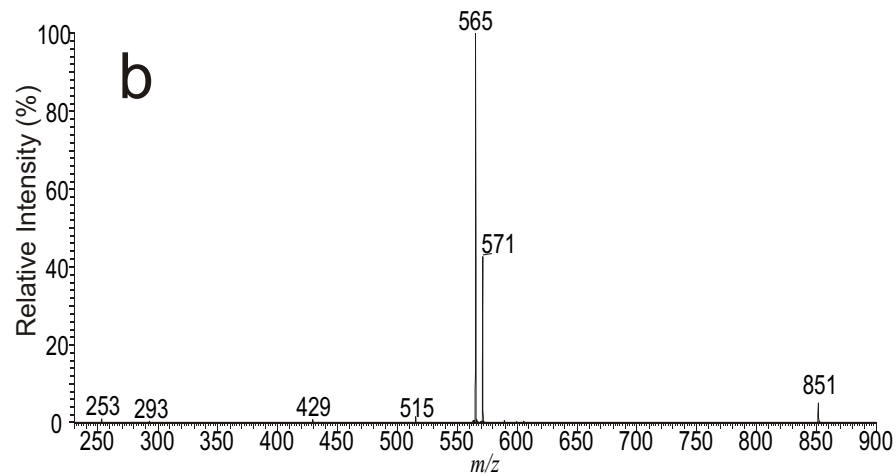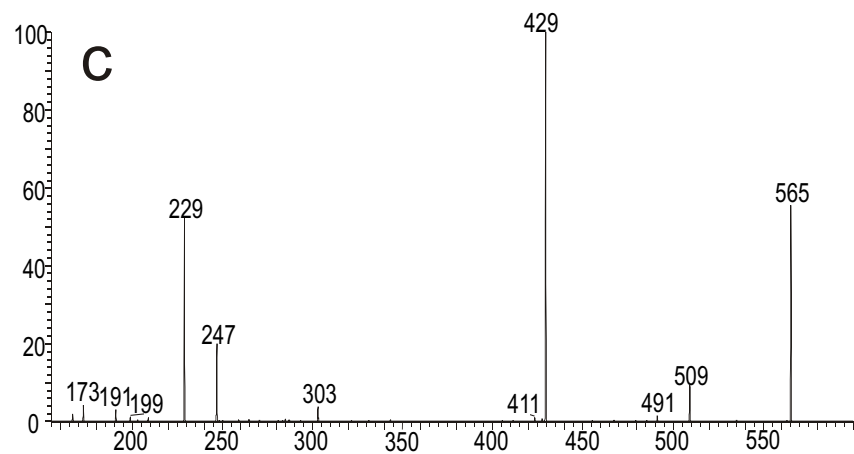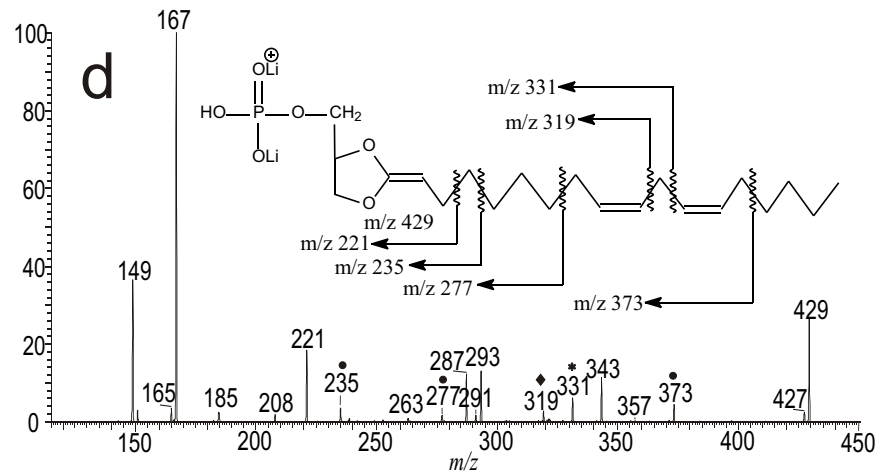

Supplement: NIHMS235257-supplement-02.pdf [file NIHMS235257-supplement-02.pdf]
